# Supplementary material for: Opposite-charge repulsive cation and anion pair cooperative organocatalysis in ring-opening polymerization
Source: Royal Society of Chemistry journal article supplement (doi:10.1039/c8py00338f), 2018-01-01
Supplement: c8py00338f1.pdf [file c8py00338f1.pdf]

Supporting Information

**Opposite-charge repulsive cation and anion pair cooperative  
organocatalysis in ring-opening polymerization**

Jiaxi Xu, Jingjing Liu, Zhenjiang Li,\* Songquan Xu, Haixin Wang, Tianfo Guo, Yu Gao,  
Lei Zhang, Chan Zhang and Kai Guo\*

Figure S1.  $^1\text{H}$  NMR spectrum (DMSO- $d_6$ , 400 MHz) of TPAC·Cl.

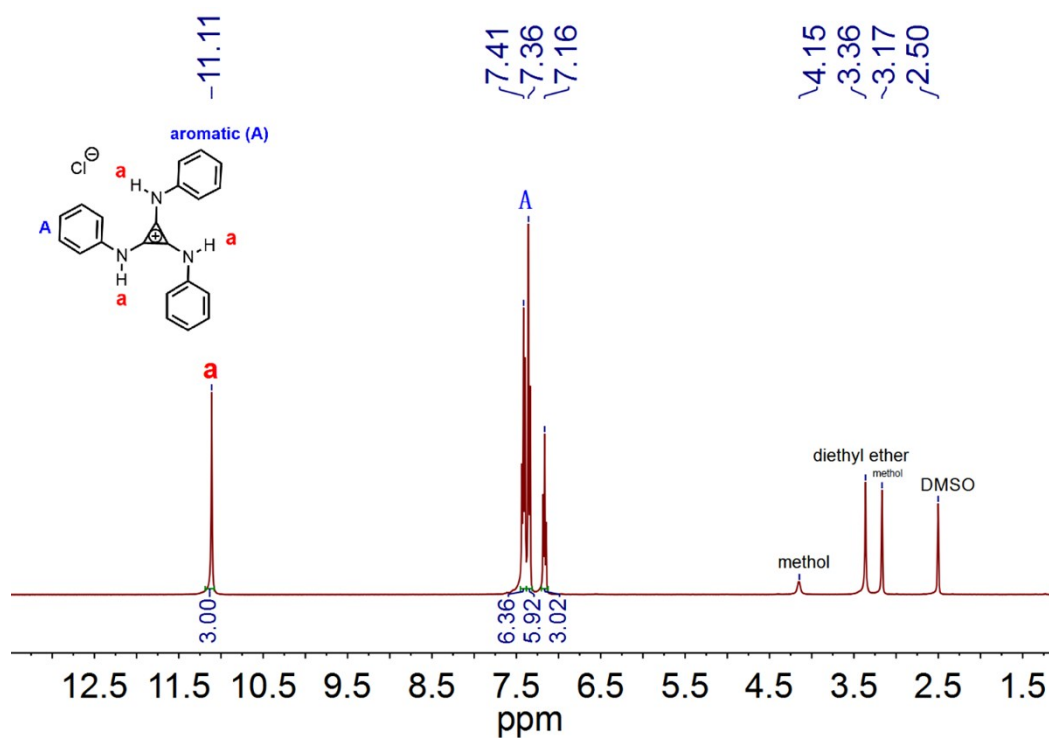

Figure S2.  $^{13}\text{C}$  NMR spectrum (DMSO- $d_6$ , 100 MHz) of TPAC·Cl.

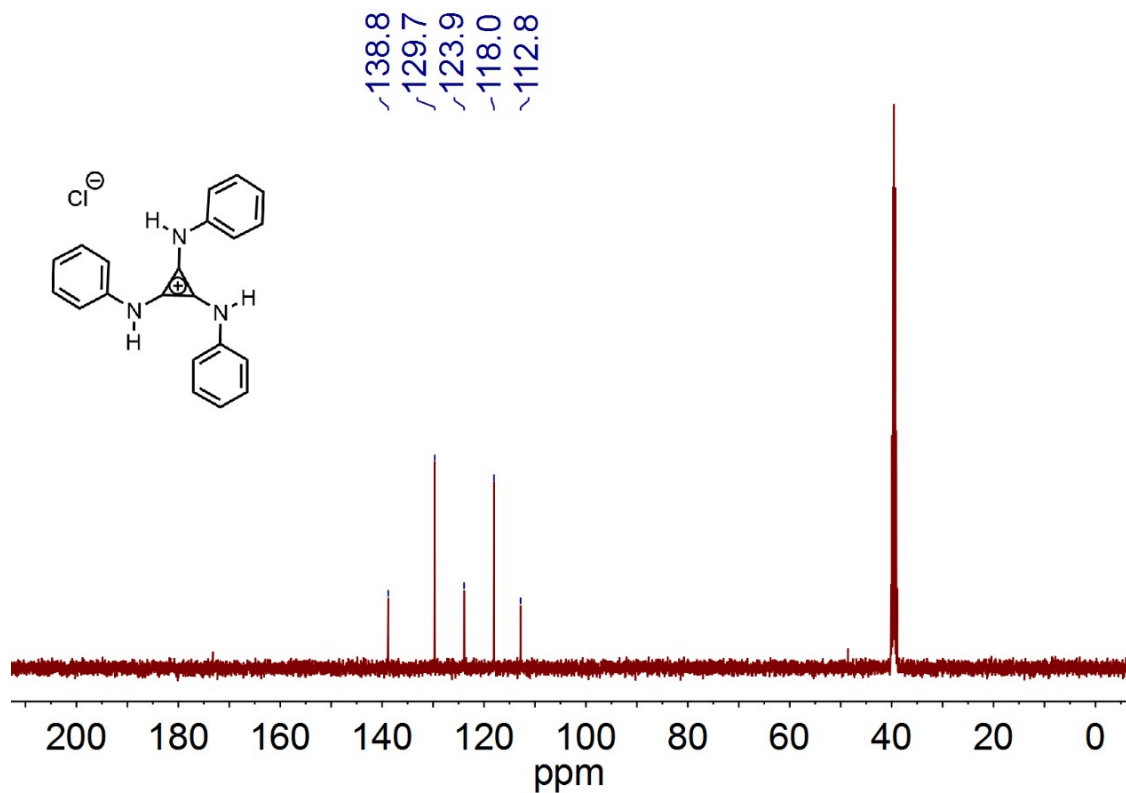

**Figure S3. X-ray crystallographic data of TPAC·Cl**

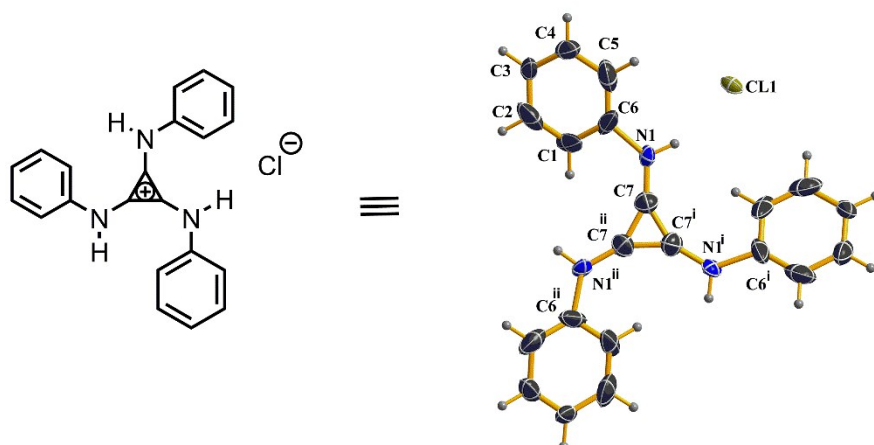

| complex                                             | <b>1</b>                                         |
|-----------------------------------------------------|--------------------------------------------------|
| Formula                                             | C <sub>21</sub> H <sub>18</sub> ClN <sub>3</sub> |
| Formula weight                                      | 347.83                                           |
| Crystal system                                      | Cubic                                            |
| space group                                         | <i>P</i> 213                                     |
| <i>a</i> (Å)                                        | 13.484(8)                                        |
| <i>b</i> (Å)                                        | 13.484(8)                                        |
| <i>c</i> (Å)                                        | 13.484(8)                                        |
| $\alpha$ (°)                                        | 90                                               |
| $\beta$ (°)                                         | 90                                               |
| $\gamma$ (°)                                        | 90                                               |
| Volume(Å <sup>3</sup> )                             | 2451.6(4)                                        |
| <i>Z</i>                                            | 4                                                |
| <i>T</i> (K)                                        | 296(2)                                           |
| <i>D</i> <sub>calcd</sub> (g/m <sup>3</sup> )       | 1.573                                            |
| <i>F</i> (000)                                      | 728                                              |
| Reflections collected                               | 2045                                             |
| Unique reflections                                  | 1846                                             |
| Goof                                                | 1.140                                            |
| <i>R</i> <sub>1</sub> [ <i>I</i> > 2σ( <i>I</i> )]  | 0.1082                                           |
| <i>wR</i> <sub>2</sub> [ <i>I</i> > 2σ( <i>I</i> )] | 0.3079 <sup>a</sup>                              |
| CCDC NO.                                            | 1509942                                          |

<sup>a</sup>  $w = 1/[\sigma^2(F_0)^2 + (0.1820P)^2 + 3.4136P]$ , where  $P = (F_0^2 + 2F_c^2)/3$ ;
